# Supplementary material
Source: PubMed Central journal article supplement (PMC3221277)
Supplement: cto0194-0382-s02.pdf [file cto0194-0382-s02.pdf]

**Supplemental Table 1.** Primer sequences used for real-time quantitative PCR.

| <b>Gene name</b>                                 | <b>Symbol</b>                 | <b>GeneID</b> | <b>Forward</b>       | <b>Reverse</b>       |
|--------------------------------------------------|-------------------------------|---------------|----------------------|----------------------|
| Tissue nonspecific alkaline phosphatase          | <i>Alpl</i> ;<br><i>Akp2</i>  | 11647         | GGGGACATGCAGTATGAGTT | GGCCTGGTAGTTGTTGTGAG |
| Progressive ankylosis protein                    | <i>Ank</i>                    | 11732         | GAATCAGTCGGCCCAT     | GTTTCGCCAGTTTATTGCT  |
| Ectonucleotide pyrophosphatase phosphodiesterase | <i>Enpp1</i> ;<br><i>PC-1</i> | 18605         | CGCCACCGAGACTAAA     | TCATAGCGTCCGTCAT     |
| Glyceraldehyde-3 phosphate dehydrogenase         | <i>Gapdh</i>                  | 14433         | ACCACAGTCCATGCCATCAC | TCCACCACCCTGTTGCTGTA |
| Osteopontin                                      | <i>Opn</i> ;<br><i>Spp1</i>   | 20750         | TTTACAGCCTGCACCC     | CTAGCAGTGACGGTCT     |

**Supplemental Table 2.** Measurements and statistics for histomorphometry of *Ank* KO and WT first mandibular molar and incisor at 45 dpc. Independent sample t-tests were performed with  $\alpha=0.05$  used to determine significance. The 95% confidence intervals for observed mean differences are reported in standard deviation (SD) units which were computed using the SD for *Ank* KO in each case. Data are represented graphically in Figure 3.

| Tissue                                      | Mean measurement ( $\mu\text{m}$ ) |                | SD ( $\mu\text{m}$ ) | p-value      | 95% confidence interval of the difference<br>Lower, Upper (SD units) |
|---------------------------------------------|------------------------------------|----------------|----------------------|--------------|----------------------------------------------------------------------|
|                                             | WT                                 | KO             |                      |              |                                                                      |
| <b>Molar – 100 <math>\mu\text{m}</math></b> |                                    |                |                      |              |                                                                      |
| Cementum (lingual)                          | 2.61<br>31.58                      | 0.67<br>2.39   | 0.001                | -14.4, -9.8  |                                                                      |
| Dentin (lingual)                            | 96.00<br>102.41                    | 16.90<br>5.48  | 0.586                | -8.0, 5.7    |                                                                      |
| Predentin (lingual)                         | 16.83<br>16.08                     | 7.50<br>2.79   | 0.883                | -5.6, 6.1    |                                                                      |
| Pulp                                        | 154.17<br>156.43                   | 14.02<br>42.45 | 0.937                | -2.3, 2.2    |                                                                      |
| Predentin (buccal)                          | 17.44<br>16.79                     | 5.04<br>1.23   | 0.845                | -9.0, 10.0   |                                                                      |
| Dentin (buccal)                             | 101.94<br>100.29                   | 14.10<br>8.43  | 0.872                | -3.2, 3.6    |                                                                      |
| Cementum (buccal)                           | 2.94<br>32.67                      | 0.42<br>4.64   | 0.008                | -8.9, -4.0   |                                                                      |
| <b>Molar – 300 <math>\mu\text{m}</math></b> |                                    |                |                      |              |                                                                      |
| Bone (lingual)                              | 151.67<br>45.38                    | 40.94<br>41.54 | 0.093                | -1.0, 6.1    |                                                                      |
| PDL (lingual)                               | 97.5<br>127.2                      | 8.28<br>0.65   | 0.024                | -76.9, -14.5 |                                                                      |
| Cementum (lingual)                          | 3.00<br>38.06                      | 0.72<br>5.83   | 0.008                | -8.4, -3.6   |                                                                      |
| Dentin (lingual)                            | 76.64<br>83.84                     | 8.87<br>1.32   | 0.294                | -21.7, 10.8  |                                                                      |
| Predentin (lingual)                         | 14.47<br>14.40                     | 2.63<br>1.71   | 0.973                | -3.1, 3.2    |                                                                      |
| Pulp                                        | 141.36<br>149.16                   | 3.16<br>19.50  | 0.562                | -2.8, 2.0    |                                                                      |
| Predentin (buccal)                          | 12.56<br>13.18                     | 3.43<br>1.93   | 0.801                | -4.0, 3.3    |                                                                      |
| Dentin (buccal)                             | 89.33<br>86.51                     | 12.74<br>6.14  | 0.753                | -3.9, 4.8    |                                                                      |
| Cementum (buccal)                           | 2.83<br>26.07                      | 0.17<br>3.42   | 0.007                | -9.3, -4.3   |                                                                      |
| PDL (buccal)                                | 84.72<br>98.11                     | 4.86<br>13.27  | 0.216                | -3.2, 1.2    |                                                                      |
| Bone (buccal)                               | 82.83<br>68.65                     | 7.52<br>36.26  | 0.571                | -2.0, 2.7    |                                                                      |

| <b>Molar – 500 μm</b>  |                  |                |       |              |
|------------------------|------------------|----------------|-------|--------------|
| Bone (lingual)         | 328.04<br>224.67 | 22.31<br>82.02 | 0.153 | -1.0, 3.5    |
| PDL (lingual)          | 121.17<br>114.74 | 16.60<br>11.65 | 0.616 | -2.4, 3.5    |
| Cementum (lingual)     | 3.61<br>29.34    | 0.35<br>3.08   | 0.004 | -10.8, -5.9  |
| Dentin (lingual)       | 67.22<br>54.26   | 7.02<br>12.20  | 0.204 | -1.0, 3.1    |
| Predentin (lingual)    | 13.56<br>12.49   | 1.99<br>2.80   | 0.622 | -1.7, 2.4    |
| Pulp                   | 151.72<br>153.22 | 13.30<br>10.33 | 0.885 | -2.8, 2.5    |
| Predentin (buccal)     | 11.06<br>11.60   | 0.92<br>2.09   | 0.709 | -2.4, 1.9    |
| Dentin (buccal)        | 76.17<br>71.58   | 9.18<br>8.45   | 0.559 | -1.8, 2.9    |
| Cementum (buccal)      | 3.00<br>27.13    | 0.44<br>0.90   | 0.000 | -28.9, -24.7 |
| PDL (buccal)           | 66.11<br>89.91   | 9.74<br>3.53   | 0.039 | -12.8, -0.7  |
| Bone (buccal)          | 88.06<br>89.63   | 12.02<br>15.29 | 0.895 | -2.2, 2.0    |
| <b>Molar – CEJ-ABC</b> |                  |                |       |              |
| Lingual aspect         | 168.44<br>330.17 | 5.64<br>33.51  | 0.012 | -7.2, -2.4   |
| Buccal aspect          | 111.22<br>188.74 | 8.75<br>17.57  | 0.007 | -3.4, -1.2   |
| <b>Incisor</b>         |                  |                |       |              |
| PDL                    | 169.49<br>210.44 | 25.95<br>40.29 | 0.225 | -3.1, 1.0    |
| Cementum (lingual)     | 2.12<br>21.36    | 0.11<br>1.98   | 0.003 | -12.2, -7.2  |
| Dentin (lingual)       | 110.18<br>110.89 | 4.64<br>9.71   | 0.916 | -2.2, 2.0    |
| Predentin (lingual)    | 7.51<br>5.51     | 0.43<br>1.77   | 0.184 | -1.2, 3.4    |
| Pulp                   | 387.99<br>380.28 | 21.54<br>14.97 | 0.641 | -2.4, 3.5    |
| Predentin (labial)     | 8.89<br>7.91     | 0.82<br>1.40   | 0.368 | -1.4, 2.7    |
| Dentin (labial)        | 142.22<br>146.86 | 1.95<br>9.28   | 0.480 | -2.9, 1.9    |

**Supplemental Table 3.** Statistical analysis of OCCM.30 cementoblast gene expression over 9 days, *in vitro*. Intergroup differences were analyzed by one-way ANOVA and post-hoc Tukey test, with  $\alpha=0.05$  used to determine significance. Control (Con) conditions were DMEM with 2% FBS, while “AA” indicates addition of 50  $\mu\text{g/ml}$  ascorbic acid, and “AA + BGP” indicates addition of both 50  $\mu\text{g/ml}$  ascorbic acid and 10 mM  $\beta$ -glycerophosphate. Data are represented graphically in Figure 8.

| <b>Tissue nonspecific alkaline phosphatase (<i>Akp2</i>)</b> |                              |                                                         |                |
|--------------------------------------------------------------|------------------------------|---------------------------------------------------------|----------------|
| <b>Time point (days)</b>                                     | <b>Intergroup comparison</b> | <b>Mean difference (1-2), relative expression units</b> | <b>p-value</b> |
| 1                                                            | Con vs. AA                   | -1,373                                                  | 0.488          |
|                                                              | Con vs. AA+BGP               | -3,370                                                  | 0.027          |
|                                                              | AA vs. AA+BGP                | -1,997                                                  | 0.215          |
| 3                                                            | Con vs. AA                   | -7,595                                                  | 0.213          |
|                                                              | Con vs. AA+BGP               | -20,720                                                 | 0.002          |
|                                                              | AA vs. AA+BGP                | -13,130                                                 | 0.024          |
| 5                                                            | Con vs. AA                   | -9,233                                                  | 0.003          |
|                                                              | Con vs. AA+BGP               | -1,957                                                  | 0.674          |
|                                                              | AA vs. AA+BGP                | 7,276                                                   | 0.012          |
| 6                                                            | Con vs. AA                   | -4,946                                                  | 0.042          |
|                                                              | Con vs. AA+BGP               | 3,977                                                   | 0.105          |
|                                                              | AA vs. AA+BGP                | 8,923                                                   | 0.001          |
| 7                                                            | Con vs. AA                   | -1,193                                                  | 0.343          |
|                                                              | Con vs. AA+BGP               | 9,417                                                   | 0.000          |
|                                                              | AA vs. AA+BGP                | 10,610                                                  | 0.000          |
| 8                                                            | Con vs. AA                   | -1,066                                                  | 0.893          |
|                                                              | Con vs. AA+BGP               | 11,060                                                  | 0.000          |
|                                                              | AA vs. AA+BGP                | 12,130                                                  | 0.000          |
| 9                                                            | Con vs. AA                   | 1,006                                                   | 0.914          |
|                                                              | Con vs. AA+BGP               | 9,047                                                   | 0.002          |
|                                                              | AA vs. AA+BGP                | 8,041                                                   | 0.004          |
| <b>Osteopontin (<i>Opn</i>)</b>                              |                              |                                                         |                |
| <b>Time point (days)</b>                                     | <b>Intergroup comparison</b> | <b>Mean difference (1-2), relative expression units</b> | <b>p-value</b> |
| 1                                                            | Con vs. AA                   | -0.0119                                                 | 0.948          |
|                                                              | Con vs. AA+BGP               | -0.0725                                                 | 0.046          |
|                                                              | AA vs. AA+BGP                | -0.0606                                                 | 0.098          |
| 3                                                            | Con vs. AA                   | 0.0606                                                  | 0.278          |
|                                                              | Con vs. AA+BGP               | 0.0510                                                  | 0.407          |
|                                                              | AA vs. AA+BGP                | -0.00967                                                | 0.989          |
| 5                                                            | Con vs. AA                   | 0.106                                                   | 0.937          |
|                                                              | Con vs. AA+BGP               | -1.01                                                   | 0.003          |
|                                                              | AA vs. AA+BGP                | -1.11                                                   | 0.001          |
| 6                                                            | Con vs. AA                   | 0.137                                                   | 0.999          |
|                                                              | Con vs. AA+BGP               | -8.82                                                   | 0.000          |
|                                                              | AA vs. AA+BGP                | -8.95                                                   | 0.000          |
| 7                                                            | Con vs. AA                   | 0.0749                                                  | 0.995          |

|                                                                        |                              |                                                             |                |
|------------------------------------------------------------------------|------------------------------|-------------------------------------------------------------|----------------|
|                                                                        | Con vs. AA+BGP               | -3.36                                                       | 0.000          |
|                                                                        | AA vs. AA+BGP                | -3.44                                                       | 0.000          |
| 8                                                                      | Con vs. AA                   | -0.0529                                                     | 0.992          |
|                                                                        | Con vs. AA+BGP               | -2.12                                                       | 0.00           |
|                                                                        | AA vs. AA+BGP                | -2.07                                                       | 0.00           |
| 9                                                                      | Con vs. AA                   | 0.0388                                                      | 1.000          |
|                                                                        | Con vs. AA+BGP               | -2.50                                                       | 0.007          |
|                                                                        | AA vs. AA+BGP                | -2.54                                                       | 0.006          |
| <b>Progressive ankylosis (<i>Ank</i>)</b>                              |                              |                                                             |                |
| <b>Time point (days)</b>                                               | <b>Intergroup comparison</b> | <b>Mean difference (1-2),<br/>relative expression units</b> | <b>p-value</b> |
| 1                                                                      | Con vs. AA                   | -0.0813                                                     | 0.698          |
|                                                                        | Con vs. AA+BGP               | -0.334                                                      | 0.008          |
|                                                                        | AA vs. AA+BGP                | -0.252                                                      | 0.037          |
| 3                                                                      | Con vs. AA                   | -0.114                                                      | 0.118          |
|                                                                        | Con vs. AA+BGP               | -0.353                                                      | 0.000          |
|                                                                        | AA vs. AA+BGP                | -0.239                                                      | 0.003          |
| 5                                                                      | Con vs. AA                   | -0.0935                                                     | 0.278          |
|                                                                        | Con vs. AA+BGP               | -2.65                                                       | 0.002          |
|                                                                        | AA vs. AA+BGP                | -0.171                                                      | 0.029          |
| 6                                                                      | Con vs. AA                   | -0.0124                                                     | 0.999          |
|                                                                        | Con vs. AA+BGP               | -0.471                                                      | 0.005          |
|                                                                        | AA vs. AA+BGP                | -0.458                                                      | 0.006          |
| 7                                                                      | Con vs. AA                   | -0.0410                                                     | 0.961          |
|                                                                        | Con vs. AA+BGP               | -0.449                                                      | 0.003          |
|                                                                        | AA vs. AA+BGP                | -0.408                                                      | 0.006          |
| 8                                                                      | Con vs. AA                   | 0.00297                                                     | 1.000          |
|                                                                        | Con vs. AA+BGP               | -0.343                                                      | 0.001          |
|                                                                        | AA vs. AA+BGP                | -0.346                                                      | 0.001          |
| 9                                                                      | Con vs. AA                   | 0.0448                                                      | 0.389          |
|                                                                        | Con vs. AA+BGP               | -0.219                                                      | 0.000          |
|                                                                        | AA vs. AA+BGP                | -0.264                                                      | 0.000          |
| <b>Ectonucleotide pyrophosphatase/phosphodiesterase (<i>Enpp1</i>)</b> |                              |                                                             |                |
| <b>Time point (days)</b>                                               | <b>Intergroup comparison</b> | <b>Mean difference (1-2),<br/>relative expression units</b> | <b>p-value</b> |
| 1                                                                      | Con vs. AA                   | -424                                                        | 0.413          |
|                                                                        | Con vs. AA+BGP               | -1,300                                                      | 0.005          |
|                                                                        | AA vs. AA+BGP                | -874                                                        | 0.039          |
| 3                                                                      | Con vs. AA                   | -1,930                                                      | 0.000          |
|                                                                        | Con vs. AA+BGP               | -2,990                                                      | 0.000          |
|                                                                        | AA vs. AA+BGP                | -1,060                                                      | 0.007          |
| 5                                                                      | Con vs. AA                   | -570                                                        | 0.724          |
|                                                                        | Con vs. AA+BGP               | -2,810                                                      | 0.004          |
|                                                                        | AA vs. AA+BGP                | -2,240                                                      | 0.014          |
| 6                                                                      | Con vs. AA                   | -584                                                        | 0.997          |
|                                                                        | Con vs. AA+BGP               | -14,700                                                     | 0.005          |
|                                                                        | AA vs. AA+BGP                | -12,700                                                     | 0.006          |

|   |                |        |       |
|---|----------------|--------|-------|
| 7 | Con vs. AA     | -1,340 | 0.980 |
|   | Con vs. AA+BGP | -8,010 | 0.179 |
|   | AA vs. AA+BGP  | -6,670 | 0.297 |
| 8 | Con vs. AA     | -1,560 | 0.694 |
|   | Con vs. AA+BGP | -3,690 | 0.113 |
|   | AA vs. AA+BGP  | -2,130 | 0.472 |
| 9 | Con vs. AA     | -345   | 0.975 |
|   | Con vs. AA+BGP | -1,520 | 0.330 |
|   | AA vs. AA+BGP  | -1,180 | 0.528 |
